# Supplementary material for: Unraveling the amine oxidative coupling activity of hierarchical porous Fe–N4–O1 single-atom catalysts: oxygen atom-mediated dual reaction pathway
Source: Royal Society of Chemistry journal article supplement (doi:10.1039/d2ta07198c), 2022-01-01
Supplement: d2ta07198c1.pdf [file d2ta07198c1.pdf]

# Unraveling the amines oxidative coupling activity of hierarchical porous Fe–N<sub>4</sub>–O<sub>1</sub> single-atom catalysts: Oxygen atoms-mediated dual reaction pathway

Hongwei He,<sup>‡acd</sup> Kui Ma,<sup>‡b</sup> Huibin Liu,<sup>acd</sup> Jing Li,<sup>acd</sup> Lirong Zheng,<sup>e</sup> Fengbao Zhang,<sup>acd</sup> Xiaobin Fan,<sup>acd</sup> Wenchao Peng,<sup>acd</sup> Junyi Ji<sup>\*b</sup> and Yang Li<sup>\*acd</sup>

<sup>a</sup> School of Chemical Engineering and Technology, Tianjin University, Tianjin 300354, P. R. China

<sup>b</sup> School of Chemical Engineering, Sichuan University, Chengdu 610065, P. R. China

<sup>c</sup> Haihe Laboratory of Sustainable Chemical Transformations, Tianjin 300192, P. R. China

<sup>d</sup> Institute of Shaoxing, Tianjin University, Zhejiang 312300, P. R. China

<sup>e</sup> Beijing Synchrotron Radiation Facility, Institute of High Energy Physics, Chinese Academy of Sciences, Beijing 100049, P. R. China

## Supplementary experimental section

### ***Sample characterization***

The obtained hybrids were characterized by transmission electronic microscopy (TEM, JEM-2100 F) and scanning electron microscopy (SEM, Hitachi, S-4800), high-angle annular dark-field scanning transmission electron microscopy (HAADF-STEM), N<sub>2</sub> adsorption/desorption measurements (Bjbuilder, SSA-7000), X-ray photoelectron spectroscopy (XPS, Escalab 250 Xi), X-ray diffraction (XRD, AXS D8-Focus, Cu-K $\alpha$  radiation). The reactions were monitored by ultraviolet-visible absorption spectroscopy (UV-DRS; Shimadzu UV-2600), gas chromatography (GC; Agilent 6890N GC-FID system) and electron paramagnetic resonance spectrometer (EPR, E580). X-ray absorption near-edge structure (XANES) and extended X-ray absorption fine structure (EXAFS) measurements were performed at 1W1B beamline of Beijing Synchrotron Radiation Facility (BSRF). The X-ray absorption spectra were detected in the transmission mode. Using the Athena program of the IFEFFIT package, the background of the spectra was removed by extrapolating the pre-edge region onto the EXAFS region, and the  $\chi(E)$  data were normalized with respect to the edge jump step. Then the normalized  $\chi(E)$  was transformed from energy space to k-space with  $\chi(k)$  multiplied by  $k^3$  to compensate for the contributions from light scatters. Finally, the  $k^3\chi(k)$  data in k-space ranging from 3.0 to 10.0  $\text{\AA}^{-1}$  were Fourier-transformed to R-space to get the radial structure function spectra (RSFs). The XANES spectra of Fe foil and Fe<sub>2</sub>O<sub>3</sub> were employed as the references.

### ***Methods for RSFs simulation***

The  $\chi(k)$  data of the processed EXAFS spectra were fitted in R space ranging from 1.0 to 2.0  $\text{\AA}$  with the Artemis program of the IFEFFIT package. From this simulation, structural parameters including coordination number (N), coordination distance (R), Debye-Waller factors ( $\sigma^2$ ) and inner potential correction ( $\Delta E_0$ ) were obtained. Theoretical RSFs of the samples were calculated using FEFF and their crystal structure parameters searched in FindIt database were compiled as the input data.

### ***DFT calculations***

Vienna ab-initio simulation package (VASP) based on density functional theory (DFT) was used for the entire calculations.<sup>1</sup> Projector augmented wave (PAW) method and Perdew-Burke-Ernzerhof functional were adopted for describing the interactions of inner core and valence electrons and calculating the exchange and correlation energies<sup>2, 3</sup>. Cutoff energy was set to 400 eV, and Brillouin zone was conducted using a 1 $\times$ 1 $\times$ 1 Monkhorst-Pack grid. The structure was optimized until reaching convergence. The convergence precisions of energy and force were set to  $1.0 \times 10^{-5}$  and 0.02 eV/ $\text{\AA}$ , respectively. Spin polarization and van der Waals force (DFT-D2) were considered for a higher accuracy.

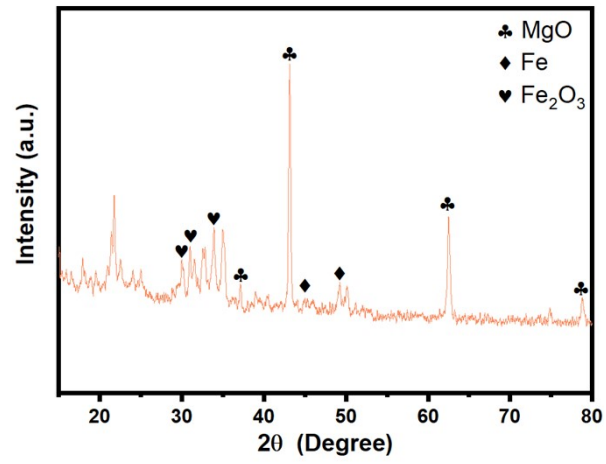

**Fig. S1** The XRD pattern of Fe-NC before HCl treatment (wFe-NC). The diffraction peaks of metallic Fe (JCPDS number 50-1275), Fe<sub>2</sub>O<sub>3</sub> (JCPDS number 40-1139) and MgO (JCPDS number 45-0946) are clearly observed in the XRD pattern.

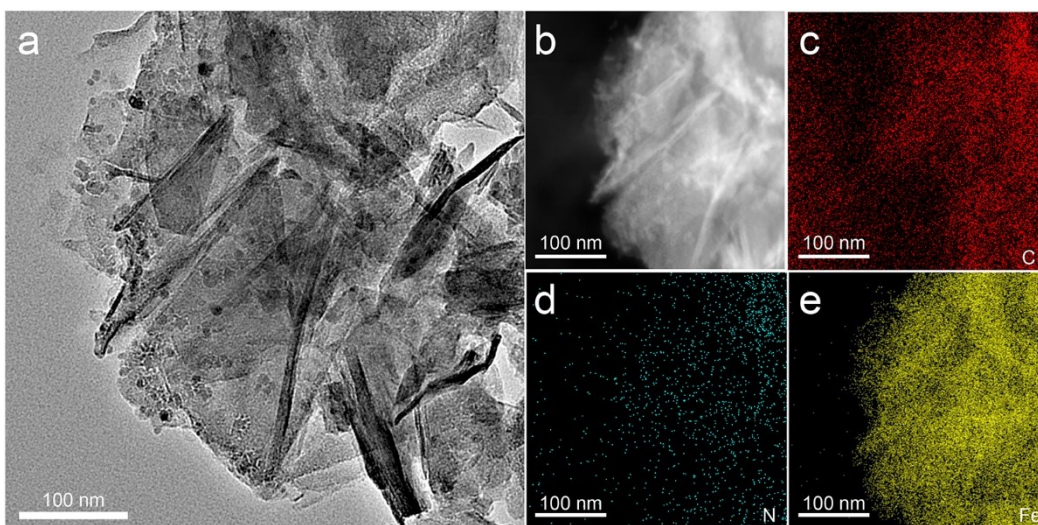

**Fig. S2** The TEM (a), HADDF-STEM (b) and corresponding element maps showing the distribution of C (c), N (d) and

Fe (e) images of wFe-NC.

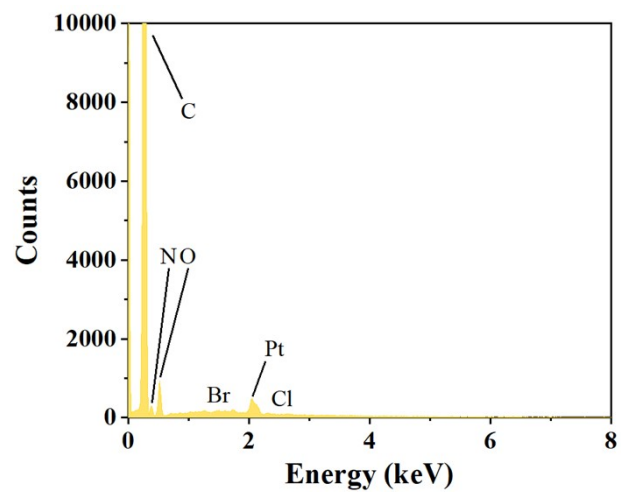

**Fig. S3** EDS spectrum of Fe-NC. (The peak at 2.06 keV belongs to the platinum sprayed on the surface of the sample during the SEM test)

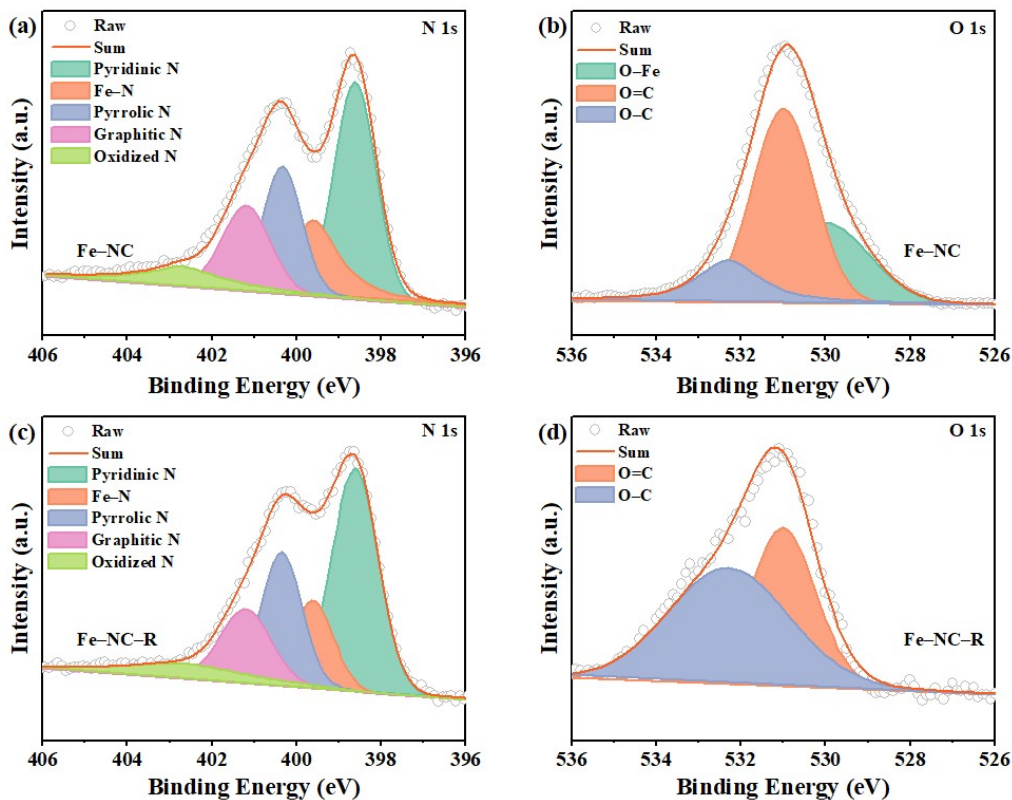

**Fig. S4** The N 1s (a) and O 1s (b) high-resolution XPS spectrum of Fe-NC. The N 1s (c) and O 1s (d) high-resolution XPS spectrum of Fe-NC-R.

The N 1s high-resolution XPS spectrum of Fe-NC can be deconvoluted into pyridinic N (398.62 eV), Fe-N (399.6 eV), pyrrolic N (400.34 eV), graphitic N (401.2 eV) and oxidized N (402.7 eV), respectively (**Fig. S4a**). The O 1s high-resolution XPS spectrum of Fe-NC can be deconvoluted into O-Fe (530 eV), O=C (531 eV) and O-C (532.3 eV), respectively (**Fig. S4b**). Compared with the N 1s and O 1s high-resolution XPS spectra of Fe-NC, there is the peak of Fe-N in the N 1s high-resolution XPS spectrum of Fe-NC-R (**Fig. S4c**), but the peak of O-Fe is not observed in the O 1s high-resolution XPS spectrum of Fe-NC-R (**Fig. S4d**). These results further demonstrate that Fe-NC and Fe-NC-R possess  $\text{FeN}_4\text{O}_1$  and  $\text{FeN}_4$  configuration.

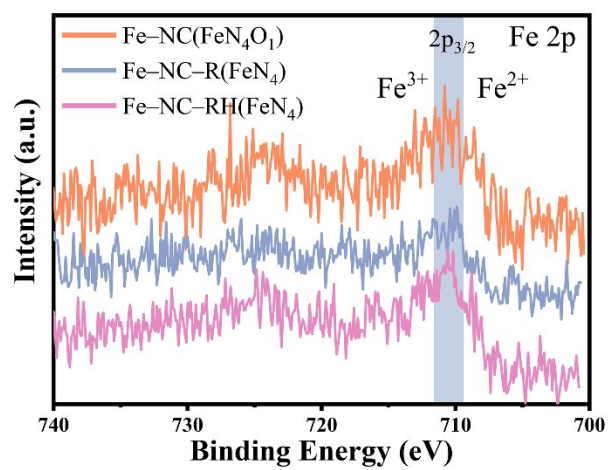

Fig. S5 XPS Fe 2p spectra of Fe-NC, Fe-NC-R and Fe-NC-RH, respectively.

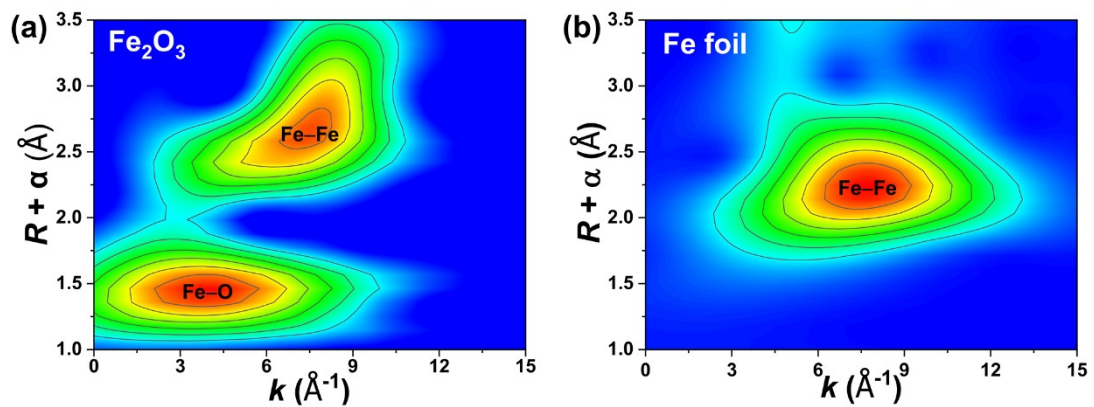

Fig. S6 Wavelet transform (WT) of the  $k^3$ -weighted EXAFS data of  $\text{Fe}_2\text{O}_3$  (a) and Fe foil (b), respectively.



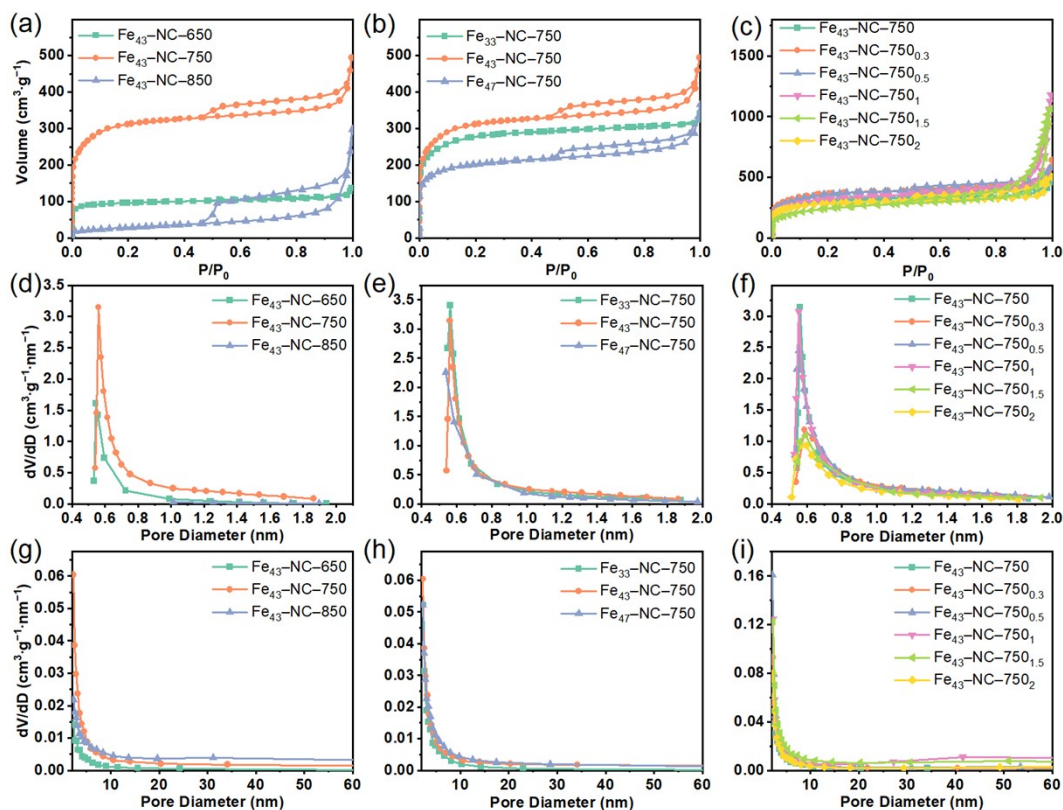

**Fig. S7** Nitrogen adsorption-desorption isotherms of the catalysts with different pyrolysis temperature (a) and amounts of  $\text{FeCl}_3$  (b) or  $\text{MgO}$  (c), as well as corresponding pore size distribution curves (d–i). All as-prepared catalysts are referred as  $\text{Fe}_x\text{-NC-}y_z$  ( $x$  represents the mass fraction of  $\text{FeCl}_3$  in ionic liquid,  $y$  represents the pyrolysis temperature,  $z$  represents the amount of  $\text{MgO}$ ).

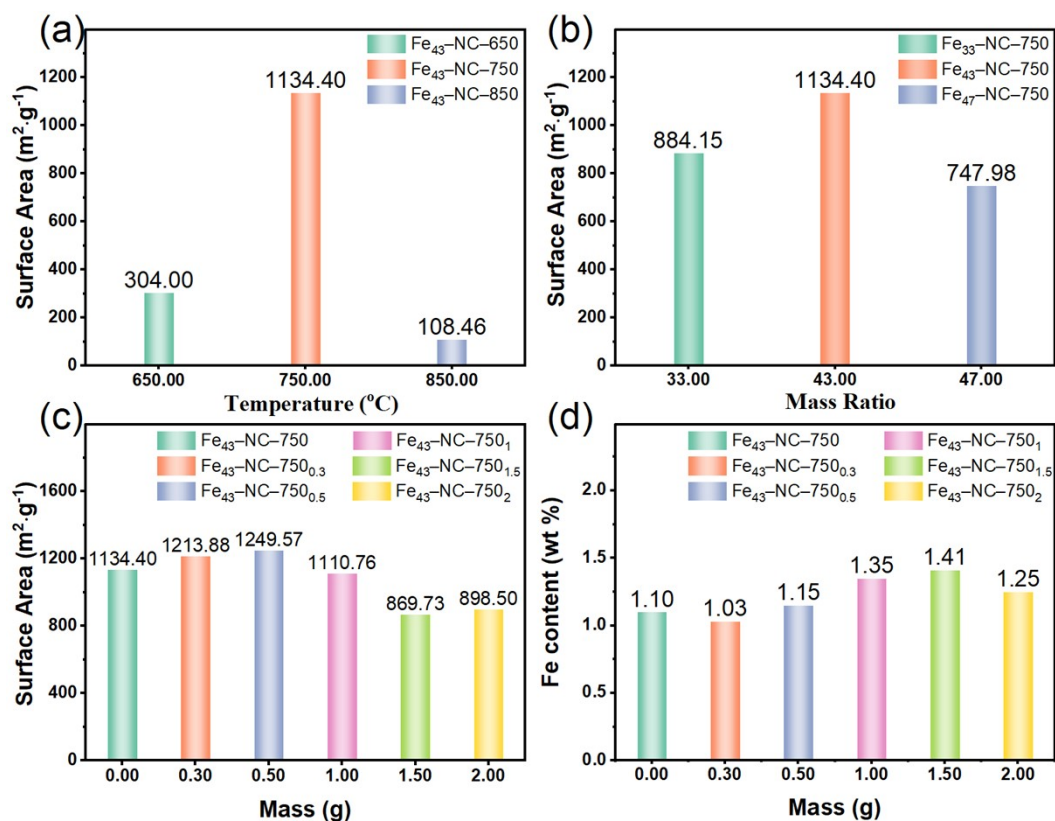

**Fig. S8** The Brunauer–Emmett–Teller (BET) surface areas of catalysts with different pyrolysis temperature (a), contents of FeCl<sub>3</sub> in ionic liquid (b) and amounts of or MgO (c). (d) The Fe content in catalysts with different amounts of or MgO. All as-prepared catalysts are referred as Fe<sub>x</sub>-NC-*y*<sub>z</sub> (x represents the mass fraction of FeCl<sub>3</sub> in ionic liquid. *y* represents the pyrolysis temperature. *z* represents the amount of MgO.)

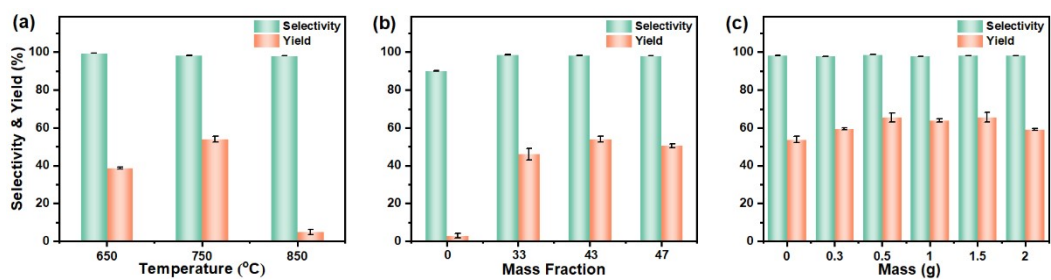

**Fig. S9** The effect of the pyrolysis temperature (a), the content of FeCl<sub>3</sub> in ionic liquid (b) and the amount of MgO (c) on the catalytic performances of the catalysts<sup>a)</sup>.

<sup>a)</sup>The reaction is carried out with benzylamine (2.5 mmol), catalyst (20 mg) and p-xylene (5 mL) at 120 °C for 4 h in air condition.

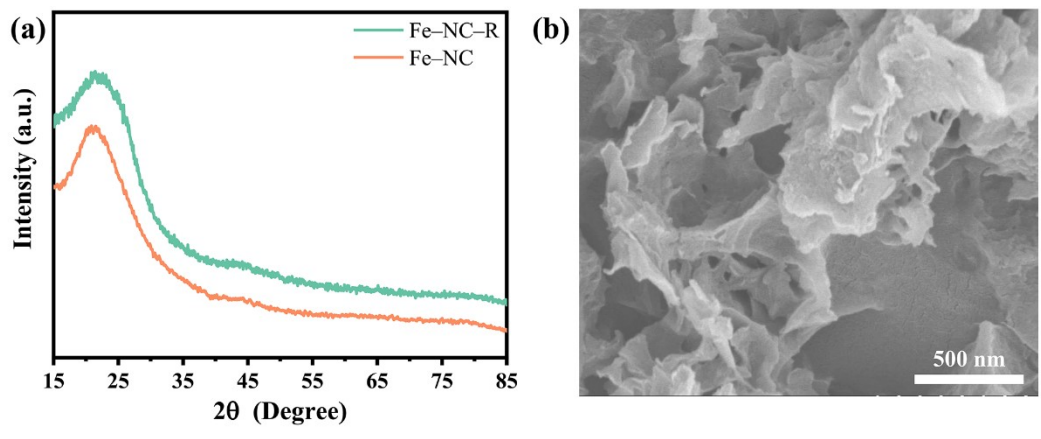

**Fig. S10** (a) The XRD patterns of Fe-NC and Fe-NC-R. (b) The SEM image of Fe-NC-R.

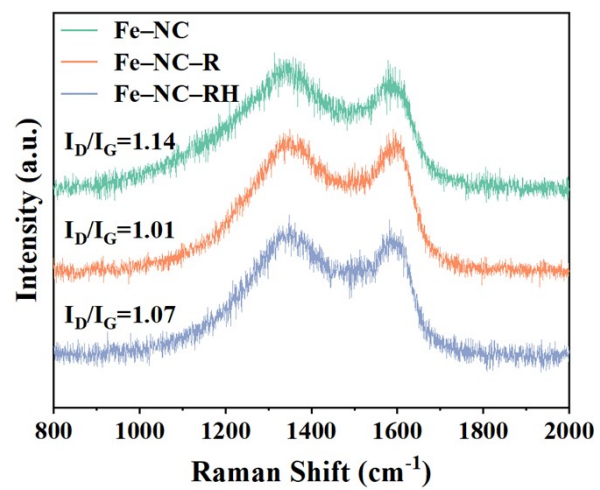

Fig. S11 Raman spectra of Fe-NC, Fe-NC-R and Fe-NC-RH.

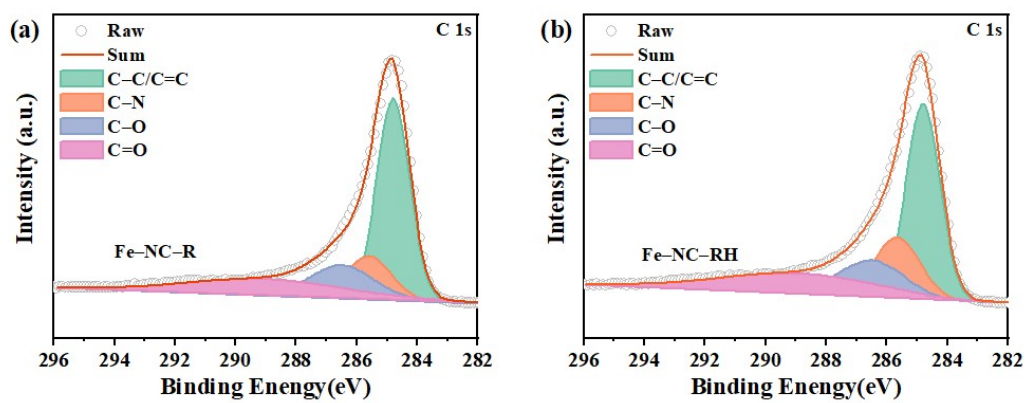

**Fig. S12** The C 1s high-resolution XPS spectrum of Fe-NC-R (a) and Fe-NC-RH (b).

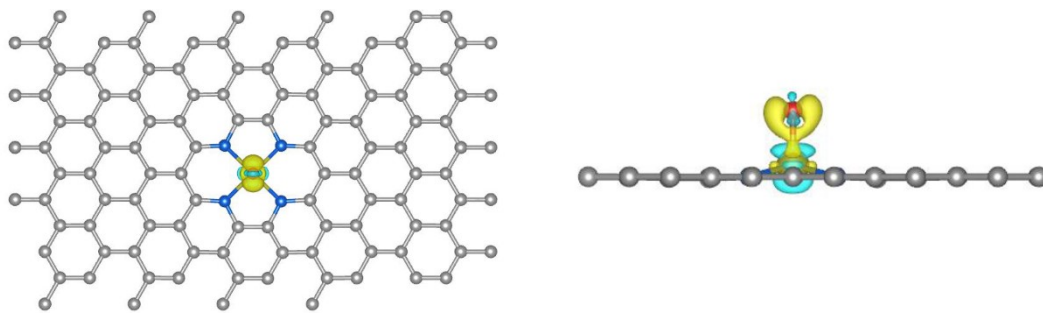

**Fig. S13** Difference of charge density of Fe-NC(FeN<sub>4</sub>O<sub>1</sub>). (The isosurface level is 0.015 eÅ<sup>-3</sup>. The yellow and blue isosurface present electron donation and accumulation, respectively.)

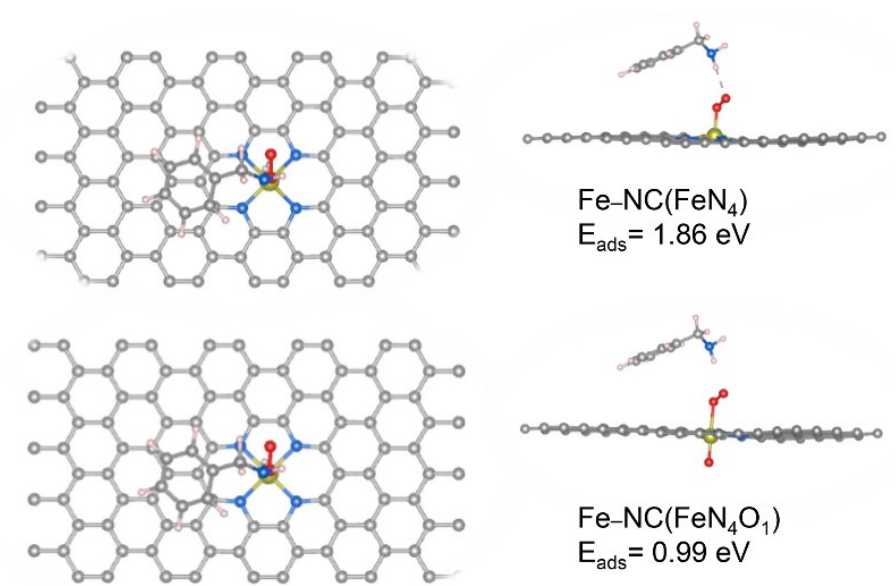

**Fig. S14** Simulated structures of benzylamine and O<sub>2</sub> adsorbed on Fe-NC(FeN<sub>4</sub>) and Fe-NC(FeN<sub>4</sub>O<sub>1</sub>), respectively.



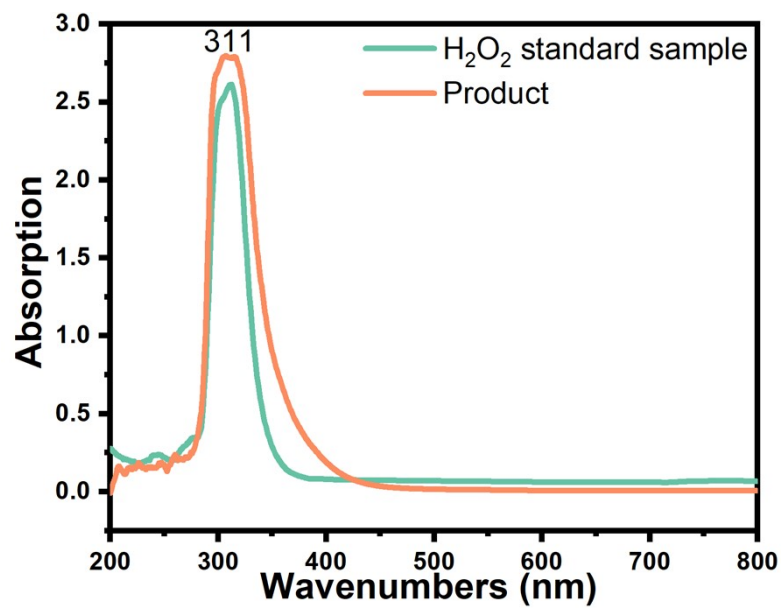

Fig. S15 Ultraviolet-visible absorption spectra the oxidation of benzylamine system.

**Table S1.** The Fe content in catalysts as determined by inductively coupled plasma mass spectrometry.

| entry | catalyst                                | Fe content (wt %) |
|-------|-----------------------------------------|-------------------|
| 1     | Fe <sub>43</sub> -NC-750                | 1.1               |
| 2     | Fe <sub>43</sub> -NC-750 <sub>0,3</sub> | 1.03              |
| 3     | Fe <sub>43</sub> -NC-750 <sub>0,5</sub> | 1.15              |
| 4     | Fe <sub>43</sub> -NC-750 <sub>1</sub>   | 1.35              |
| 5     | wFe-NC                                  | 30.11             |
| 6     | Fe-NC                                   | 1.41              |
| 7     | Fe-NC-R                                 | 1.5               |
| 8     | Fe <sub>43</sub> -NC-750 <sub>2</sub>   | 1.25              |

**Table S2.** The atomic percentages C, N, O and Fe in catalysts as determined by XPS.

| entry | catalyst | C (at %) | N (at %) | O (at %) | Fe (at %) |
|-------|----------|----------|----------|----------|-----------|
| 1     | Fe-NC    | 64.56    | 13.93    | 21.16    | 0.35      |
| 2     | Fe-NC-R  | 79.87    | 14.53    | 5.32     | 0.27      |
| 3     | Fe-NC-RH | 79.65    | 15.17    | 4.80     | 0.38      |

**Table S3.** Structural parameters extracted from the Fe K-edge EXAFS fitting. ( $S_0^2 = 0.817$ )

| Sample  | Scattering pair | CN   | R(Å) | $\sigma^2$ | $\Delta E_0$ (eV) | R factor |
|---------|-----------------|------|------|------------|-------------------|----------|
| Fe foil | Fe–Fe(1)        | 8*   | 2.46 | 0.0059     | 5.52              | 0.007    |
|         | Fe–Fe(2)        | 6*   | 2.84 | 0.0058     | 5.52              | 0.007    |
| Fe–NC   | Fe–O            | 1.37 | 2.07 | 0.0002     | 1.05              | 0.015    |
|         | Fe–N            | 3.75 | 1.98 | 0.0002     | 1.05              | 0.015    |
| Fe–NC–R | Fe–N            | 1.99 | 1.95 | 0.0009     | 0.074             | 0.019    |
|         | Fe–N            | 1.99 | 1.93 | 0.0009     | 0.074             | 0.019    |

$S_0^2$  is the amplitude reduction factor, obtained by fitting the standard sample; CN is the coordination number; R is interatomic distance (the bond length between Fe central atoms and surrounding coordination atoms);  $\sigma^2$  is Debye–Waller factor (thermal and static disorder in absorber-scatterer distances);  $\Delta E_0$  is edge–energy shift. R factor is used to assessment the goodness of the fitting.

\* Represents the value was fixed during EXAFS fitting, based on the known structure of Fe metal.

**Table S4.** The atomic percentages of surface functional groups from deconvoluted C 1s XPS spectral fitting.

| Catalyst | C-C/C=C | C-N    | C-O    | C=O    |
|----------|---------|--------|--------|--------|
| Fe-NC-R  | 49.63%  | 14.39% | 16.06% | 19.92% |
| Fe-NC-RH | 46.64%  | 18.79% | 15.50% | 19.07% |

**Table S5.** Comparison of TOF with Fe–NC and other reported catalysts for the oxidative coupling reaction of benzylamine.

| catalyst                               | TOF (h <sup>-1</sup> ) | Ref.      |
|----------------------------------------|------------------------|-----------|
| V–N–V–600                              | 53.9 <sup>a</sup>      | 4         |
| Meso Cs/MnOx                           | 1.11 <sup>b</sup>      | 5         |
| GCN–(Cu)                               | 14 <sup>c</sup>        | 6         |
| Cu <sub>meth</sub> Al <sub>butox</sub> | <0.5 <sup>d</sup>      | 7         |
| Fe–NC                                  | 58.91 <sup>e</sup>     | This work |

<sup>a</sup>TOF was calculated as moles of benzylamine converted per mole of V sites and a reaction time of 2 h. <sup>b</sup>TOF was calculated as moles of benzylamine converted per mole of catalyst and a reaction time of 3 h. <sup>c</sup>TOF was calculated as moles of benzylamine converted per mole of Cu sites and a reaction time of 24 h. <sup>d</sup>TOF was calculated as moles of benzylamine converted per mole of catalyst and a reaction time of 20 h. <sup>e</sup>TOF was calculated as moles of benzylamine converted per mole of Fe sites and a reaction time of 4 h.

## References

1. G. Kresse and J. Furthmüller, *Phys. Rev. B*, 1996, **54**, 11169.
2. P. E. Blöchl, *Phys. Rev. B*, 1994, **50**, 17953-17979.
3. J. P. Perdew, K. Burke and M. Ernzerhof, *Phys. Rev. Lett.*, 1996, **77**, 3865.
4. Q. Xu, B. Feng, C. Ye, Y. Fu, D. Chen, F. Zhang, J. Zhang and W. Zhu, *ACS Appl. Mater. Interfaces*, 2021, **13**, 15168-15177.
5. S. Biswas, B. Dutta, K. Mullick, C. H. Kuo, A. S. Poyraz and S. L. Suib, *ACS Catal.*, 2015, **5**, 4394-4403.
6. A. Bakandritsos, R. G. Kadam, P. Kumar, G. Zoppellaro, M. Medved, J. Tucek, T. Montini, O. Tomanec, P. Andryskova, B. Drahos, R. S. Varma, M. Otyepka, M. B. Gawande, P. Fornasiero and R. Zboril, *Adv. Mater.*, 2019, **31**, e1900323.
7. D. Dissanayake, L. A. Achola, P. Kerns, D. Rathnayake, J. He, J. Macharia and S. L. Suib, *Appl. Catal., B*, 2019, **249**, 32-41.
